# Supplementary material for: Folding of the Ig-Like Domain of the Dengue Virus Envelope Protein Analyzed by High-Hydrostatic-Pressure NMR at a Residue-Level Resolution
Source: MDPI journal article supplement (doi:10.3390/biom9080309), 2019-07-26
Supplement: s1 [file s1]

Supplementary materials

**Table S1.** (A) Exchange rates and Protection Factors (PF) measured for amide protons involved in the main chain hydrogen bonds stabilizing the  $\beta$ -sheets found in DEN4-ED3 (column 1). The numbers given in column 2 and 3 stand for the residue numbers of residues bearing the HN amide groups (donor) and the C=O carbonyl group (acceptor) involved in the hydrogen bond, respectively.

| $\beta$ -sheet      | Donor<br>(HN) | Acceptor<br>(C=O) | $k_{ex}$ ( $\text{min}^{-1}$ ) | +/-         | PF     | +/-    | $\log(\text{PF})$ | +/-      |
|---------------------|---------------|-------------------|--------------------------------|-------------|--------|--------|-------------------|----------|
| $\beta 1 - \beta 2$ | <b>19</b>     | 37                | 0.00024015                     | 0.000025111 | 281000 | 26600  | 5.4487            | 0.094662 |
|                     | <b>22</b>     | 44                |                                |             |        |        |                   |          |
|                     | <b>25</b>     | 33                |                                |             |        |        |                   |          |
|                     | <b>27</b>     | 31                |                                |             |        |        |                   |          |
|                     | <b>33</b>     | 25                | 0.021539                       | 0.0020828   | 369    | 32.5   | 2.567             | 0.088076 |
|                     | <b>37</b>     | 19                | 0.060076                       | 0.013766    | 276    | 51.5   | 2.4409            | 0.18659  |
|                     | <b>44</b>     | 22                |                                |             |        |        |                   |          |
| $\beta 2 - \beta 7$ | <b>32</b>     | 81                |                                |             |        |        |                   |          |
|                     | <b>34</b>     | 79                | 0.000014149                    | 0.000036761 | 256000 | 185000 | 5.4082            | 0.72266  |
|                     | <b>36</b>     | 77                | 0.0002122                      | 0.000025128 | 31100  | 3290   | 4.4928            | 0.10579  |
|                     | <b>77</b>     | 36                | 0.040561                       | 0.0057809   | 382    | 47.6   | 2.5821            | 0.12461  |
|                     | <b>79</b>     | 34                | 0.0078069                      | 0.00036378  | 1250   | 55.7   | 3.0969            | 0.04456  |
|                     | <b>81</b>     | 32                | 0.00016631                     | 0.000049409 | 28100  | 6440   | 4.4487            | 0.22918  |
| $\beta 7 - \beta 5$ | <b>62</b>     | 82                |                                |             |        |        |                   |          |
|                     | <b>64</b>     | 80                |                                |             |        |        |                   |          |
|                     | <b>65</b>     | 80                |                                |             |        |        |                   |          |
|                     | <b>82</b>     | 62                |                                |             |        |        |                   |          |
| $\beta 3 - \beta 6$ | <b>45</b>     | 70                | 0.030191                       | 0.0034243   | 1700   | 170    | 3.2304            | 0.1      |
|                     | <b>47</b>     | 68                | 0.0096568                      | 0.00071391  | 684    | 47.1   | 2.8351            | 0.068859 |
|                     | <b>70</b>     | 45                |                                |             |        |        |                   |          |
| $\beta 4 - \beta 8$ | <b>50</b>     | 91                |                                |             |        |        |                   |          |
|                     | <b>52</b>     | 89                | 0.0018881                      | 0.000135    | 9410   | 628    | 3.9736            | 0.066738 |
|                     | <b>89</b>     | 52                | 0.00024186                     | 0.000036277 | 41300  | 5390   | 4.616             | 0.13051  |
|                     | <b>91</b>     | 50                | 0.000016164                    | 0.00017437  | 182000 | 167000 | 5.2601            | 0.91758  |
|                     | <b>93</b>     | 48                | 0.0005641                      | 0.00008017  | 48800  | 6070   | 4.6884            | 0.12439  |
| $\beta 8 - \beta 9$ | <b>88</b>     | 103               | 0.00086799                     | 0.000051457 | 44800  | 2510   | 4.6513            | 0.056027 |
|                     | <b>90</b>     | 101               |                                |             |        |        |                   |          |
|                     | <b>92</b>     | 99                | 0.000010643                    | 0.000082627 | 318000 | 282000 | 5.5024            | 0.88679  |
|                     | <b>99</b>     | 92                |                                |             |        |        |                   |          |
|                     | <b>101</b>    | 90                | 0.0016711                      | 0.000080169 | 6260   | 287    | 3.7966            | 0.045847 |
|                     | <b>103</b>    | 88                | 0.015803                       | 0.001807    | 4180   | 429    | 3.6212            | 0.10263  |
|                     |               |                   |                                |             |        |        |                   |          |

**Table 2.** Sequential and structural similarity among ED3's of four dengue serotypes. [1].

| Percent identity/<br>C $\alpha$ RMSD (Å) | DEN1-ED3 | DEN2-ED3 | DEN3-ED3 | DEN4-ED3 |
|------------------------------------------|----------|----------|----------|----------|
| DEN1-ED3<br>(PDB: 3IRC)                  |          | 0.87 Å   | 0.57 Å   | 1.01 Å   |
| DEN2-ED3<br>(PDB: 3UZV)                  | 79%      |          | 0.74 Å   | 0.76 Å   |
| DEN3-ED3<br>(PDB: 3VTT)                  | 88%      | 78 %     |          | 1.07 Å   |
| DEN4-ED3<br>(PDB: 3WE1)                  | 71%      | 77 %     | 70 %     |          |

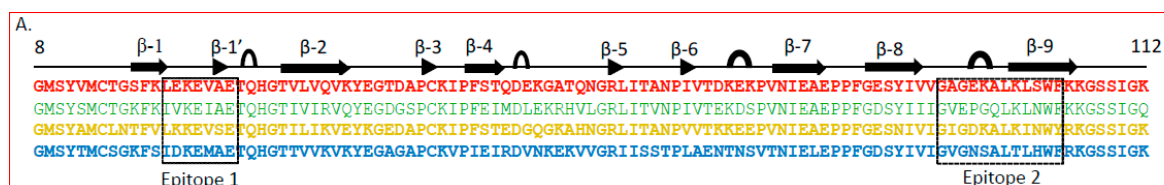**Figure S1.** (A) Sequence alignment of four serotypes of DEN ED3. (DEN1-ED3: red, DEN2-ED3: green, DEN3-ED3: yellow, DEN4-ED3: blue). The residues are numbered according to Volk et al, 2007 [2] (BMRB code 7087). Both the sequences and structures were retrieved from the PDB-IDs given in the table. The sequences start at Gly 8 and ends at Lys 112 (corresponding to Gly 294 and Lys 398, respectively, in Elahi et al. [3]). The secondary structures indicated on the top are calculated using 3WE1 and DSSP (<http://swift.cmbi.ru.nl/gv/dssp/>). The epitope regions are those shown in Lisova et al. [1].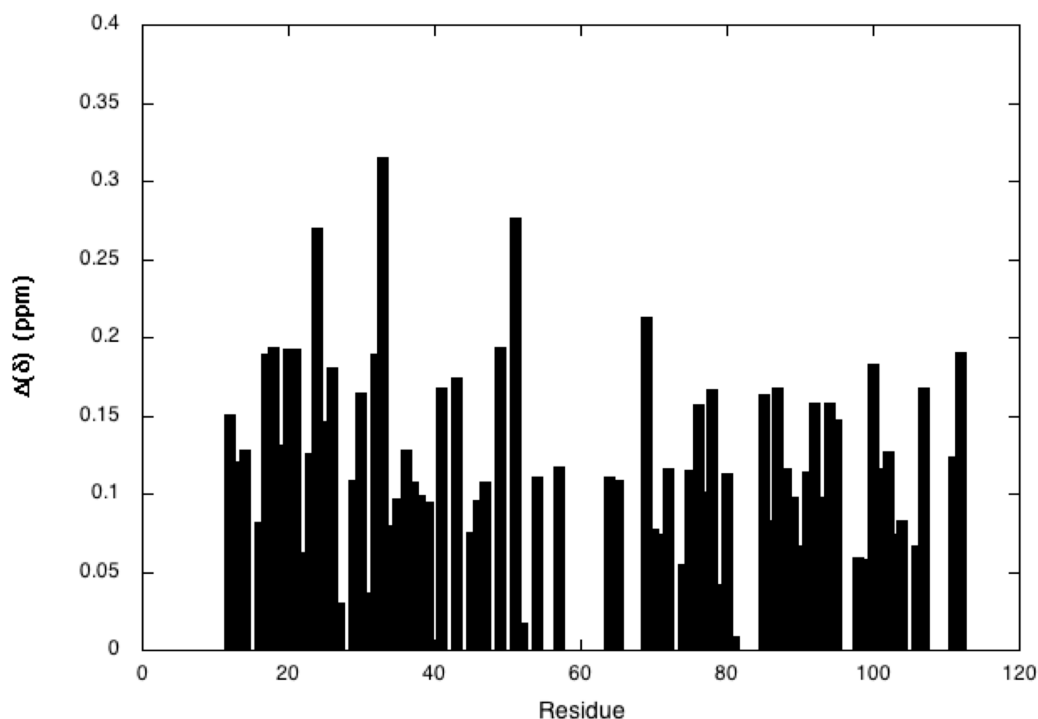**Figure S2.** (A) (Right) Average amide chemical-shift variations, calculated as  $\Delta\delta = \sqrt{\Delta\delta_H^2 + \left(\frac{\Delta\delta_N}{5}\right)^2}$ , measured between spectra recorded under the experimental conditions used in the present

denaturation study and under the conditions used for the previously published NMR structural study (25°C, 50mM Tris pH 7.5, 50 mM NaCl) ([1]; BMRB code 7087).

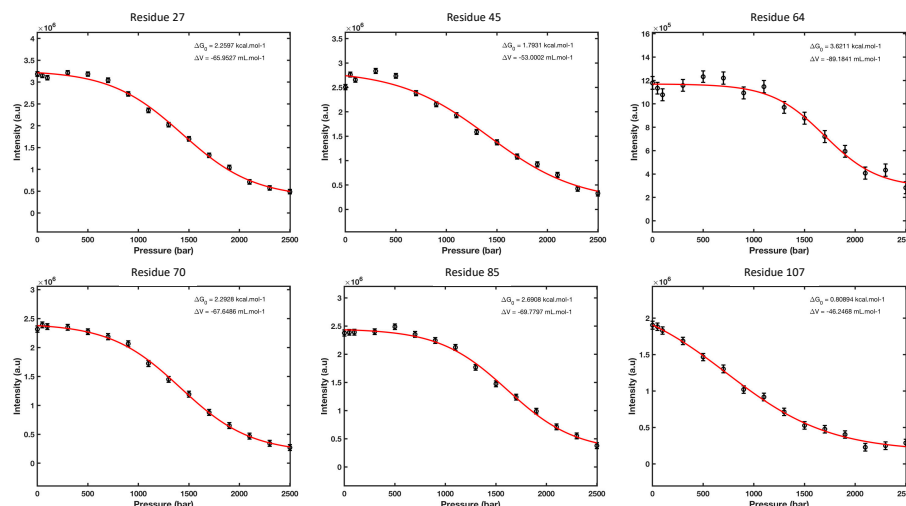

**Figure S3.** Six representative examples ( $-90 < \Delta V_u^0 < -40 \text{ ml/Mol}$ ) of fits obtained for the decrease in intensity with pressure of cross-peaks from the corresponding residues (indicated on top of each graph) with Equation 1 (Materials and Methods) implemented on a in-house MATLAB software.

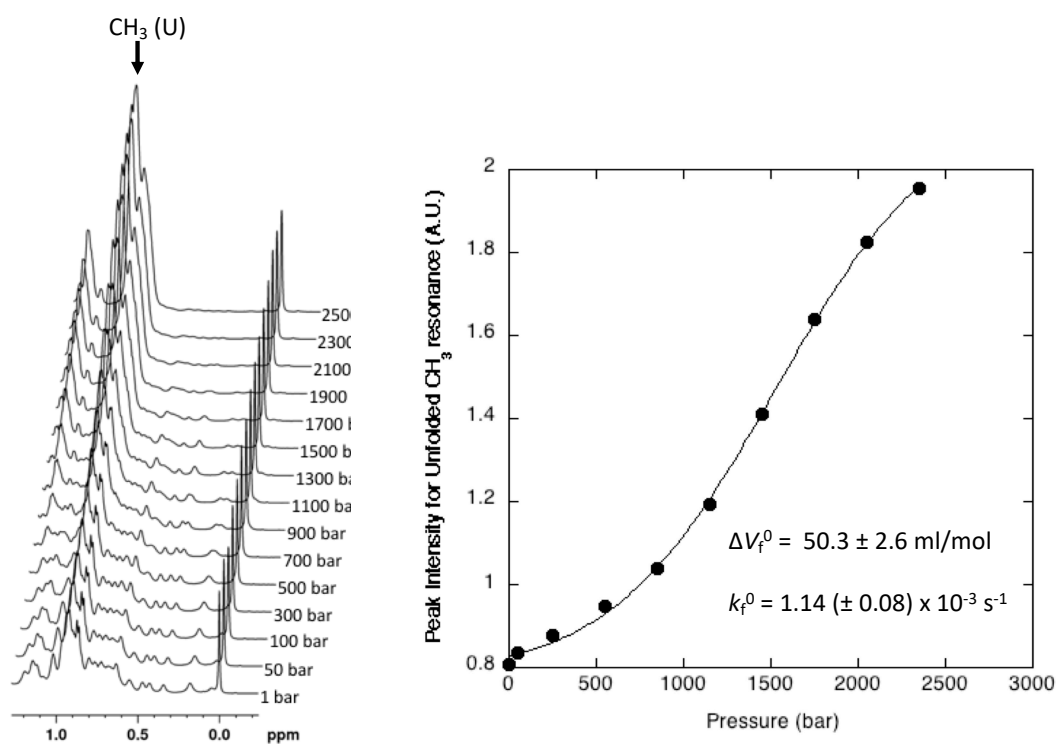

**Figure S4.** Steady-State experiments followed by High-Pressure 1D Proton NMR. (Left) Stacked plot of the 1D proton NMR spectra recorded on DEN4-ED3 at increasing pressure. The 1D NMR

experiments are recorded once the steady-state is reached, 2 hours after the *P*-Jump. Only the region of the methyl resonances is reported. The arrow indicates the resonance corresponding to unfolded methyl groups ( $\text{CH}_3$  (U)), used as probe to monitor the folding/unfolding equilibrium. (Right) Denaturation curves obtained for DEN4-ED3. The curves were fitted with Equation 1 to obtain the values of  $\Delta V_f^0$  and  $\Delta G^0$  reported in the insert.

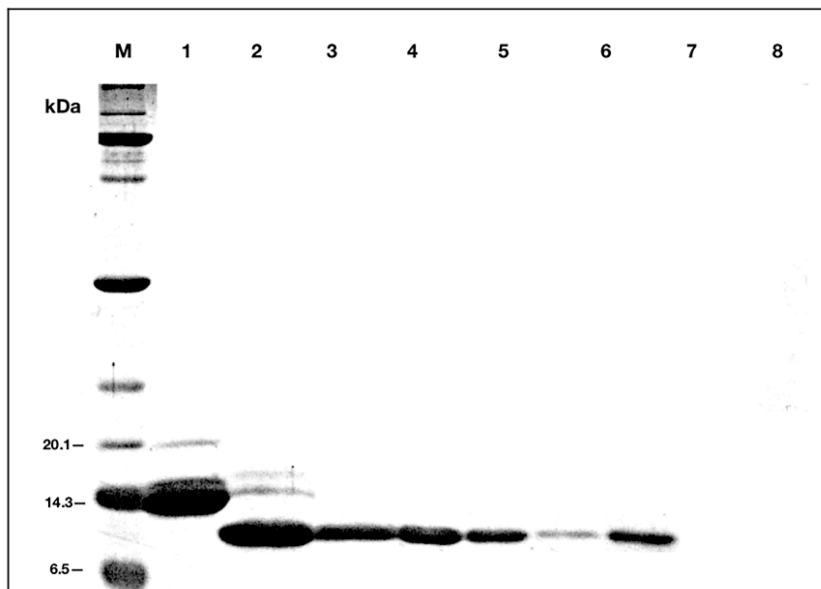

**Figure S5.** SDS-PAGE analysis of  $^{15}\text{N}$  His-DEN4 ED3 protein before and after thrombin cleavage. **M** represents the molecular weight marker (protein marker, low molecular weight range, FUJIFILM Wako chemicals). Lane-1:  $^{15}\text{N}$  His-DEN4 ED3 protein; Lane-2: His-tag cleaved  $^{15}\text{N}$  DEN4 ED3 protein; Lanes 3-8 show the His tag purification of ED3 after thrombin cleavage of the His tag. Lanes 3-5 and Lanes 6-8 indicate, respectively, the wash and the elution fractions.

**A.**

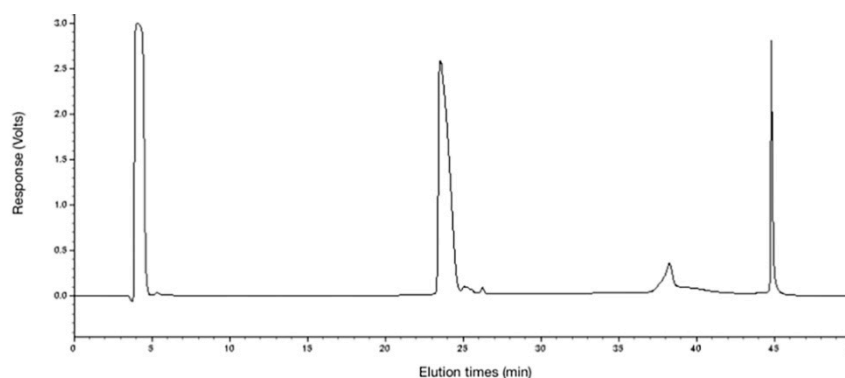

**B.**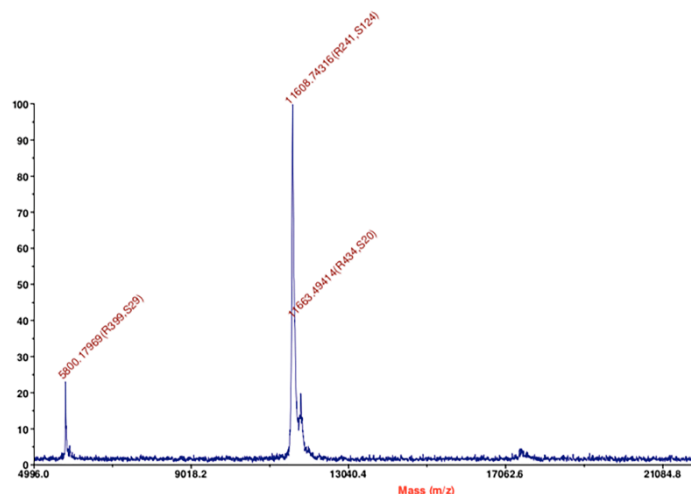

**Figure S6.** (A) Analytical reverse phase HPLC chromatogram of [ $^{15}\text{N}$ ] DEN4 ED3 (B) MALDI-TOF spectrum of [ $^{15}\text{N}$ ] DEN4 ED3. The molecular mass was 11608.74 Dalton (Calculated molecular mass=11603.00 Dalton).

## References

1. Lisova, O.; Hardy F.; Petit, V.; Bedouelle, H. Mapping to completeness and transplantation of a group-specific, discontinuous, neutralizing epitope in the envelope protein of dengue virus. *J. Gen. Virol.* **2007**, *88*, 2387–2397.
2. Volk, D.E.; Lee, Y.C.; Li, X.; Thiviyanathan, V.; Gromowski, G.D.; Li, L.; Lamb, A.R.; Beasley, D.W.C.; Barrett, A.D.T.; Gorenstein, D. G Solution structure of the envelope protein domain III of dengue-4 virus. *Virology* **2007**, *364*, 147–154.
3. Elahi, M.; Islam, M.M.; Noguchi, K.; Yohda, M.; Toh, H.; Kuroda, Y. Computational prediction and experimental characterization of a “size switch type repacking” during the evolution of dengue envelope protein domain III (ED3). *Biochim. Biophys.* **2014**, *1844*, 585–592.

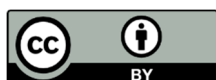

© 2019 by the authors. Submitted for possible open access publication under the terms and conditions of the Creative Commons Attribution (CC BY) license (<http://creativecommons.org/licenses/by/4.0/>).
